# Supplementary material for: Detection of the anticoagulant drug warfarin by palladium complexes
Source: Royal Society of Chemistry journal article supplement (doi:10.1039/c7dt01811h), 2017-01-01
Supplement: c7dt01811h1.pdf [file c7dt01811h1.pdf]

## **Electronic Supporting Information**

for the

Manuscript Entitled

### **Detection of anticoagulant drug warfarin by palladium complexes**

Pramod Kumar, Vijay Kumar and Rajeev Gupta\*

Department of Chemistry, University of Delhi, Delhi 110 007 (India)

#### **Index**

1. Experimental Section
2. Synthesis
3. Physical Measurements
4. X-ray Crystallography
5. Determination of Stern-Volmer Constant ( $K_{SV}$ ) and Binding Constant ( $K_b$ )
6. Determination of Detection Limit
7. References

## 1. Experimental Section

**Materials.** All reagents and metal salts were commercial available and were used without further purifications. HPLC grade solvents were used for the UV-visible and fluorescence spectral measurements. Warfarin sodium ( $\text{Na}^+\text{WR}^-$ ) was obtained from the TCI Chemicals and used as received. In addition, commercial drug WARF was also used that provided nearly identical results as that of  $\text{Na}^+\text{WR}^-$  obtained from the TCI Chemicals. All stock solutions (1 mM) of palladium complexes and anticoagulant drug  $\text{Na}^+\text{WR}^-$  were prepared in  $\text{CH}_3\text{CN}$  and/or aqueous HEPES buffer (10 mM, pH = 7.4).

**2. Synthesis.** Ligands  $\text{H}_2\text{L}^1$ - $\text{H}_2\text{L}^4$  were synthesized according to the reported procedure.<sup>1,2</sup> The palladium complexes **1** and **3** were synthesized according to the literature report.<sup>3</sup>

**Complex 2.** Ligand  $\text{H}_2\text{L}^2$  (0.10 g, 0.224 mmol) was dissolved in  $\text{CH}_3\text{CN}$  (5 mL) and a solution of  $\text{Pd}(\text{CH}_3\text{COO})_2$  in 2 mL  $\text{CH}_3\text{CN}$  (0.050 g, 0.224 mmol) was added drop-wise. The reaction mixture was stirred for 2 h at ambient temperature during which a pale yellow colored compound was precipitated. This product was filtered, washed with MeOH and dried under vacuum. Yellow crystals were obtained by the slow evaporation of a  $\text{CH}_3\text{CN}$  solution of the product within three days. Yield: 0.108 g (82%). Anal. Calc. for  $\text{C}_{31}\text{H}_{24}\text{N}_4\text{O}_2\text{Pd}$ : C, 63.00; H, 4.09; N, 9.48. Found: C, 63.06; H, 4.12; N, 9.53. FTIR spectrum (Zn-Se ATR,  $\text{cm}^{-1}$ ): 2327- 2297 ( $\text{CH}_3\text{CN}$ ), 1601 (C=O), 1374. UV/Vis ( $\text{CH}_3\text{CN}$ ):  $\lambda_{\text{max}}$  ( $\epsilon$ ,  $\text{M}^{-1} \text{cm}^{-1}$ ) = 216 (125140), 335 (20500).  $^1\text{H}$  NMR spectrum (400 MHz,  $\text{DMSO-d}_6$ ):  $\delta$  = 8.23 (t,  $J$  = 6.88 Hz, 1H), 8.09 (d,  $J$  = 6.87 Hz, 2H), 7.90 (d,  $J$  = 7.64 Hz, 2H), 7.77-7.71 (m, 6H), 7.55-7.45 (m, 6H), 4.74 (s, 4H), 2.06 (s,  $\text{CH}_3\text{CN}$ ).  $^{13}\text{C}$  NMR spectrum (400 MHz,  $\text{DMSO-d}_6$ ): 170.40, 133.50, 131.05, 128.86, 126.82, 126.28, 125.85, 124.85, 123.15.

**Complex 4.** This compound was synthesized similarly as mentioned for complex **2** using following chemical:  $\text{H}_2\text{L}^4$  (0.10 g, 0.193 mmol) and  $\text{Pd}(\text{CH}_3\text{COO})_2$  (0.043 g, 0.193 mmol). Orange-red crystals were obtained by the slow evaporation of a  $\text{CH}_3\text{CN}$  solution of the product within 2 – 3 d. Yield: 0.110 g (86%). Anal. Calc. for  $\text{C}_{37}\text{H}_{24}\text{N}_4\text{O}_2\text{Pd}$ : C, 67.02; H, 3.65; N, 8.45. Found: C, 67.18; H, 3.59; N, 8.38. FTIR spectrum ( $\text{cm}^{-1}$ ): 2332-2305 ( $\text{CH}_3\text{CN}$ ), 1623 (C=O). UV/Vis ( $\text{CH}_3\text{CN}$ ):  $\lambda_{\text{max}}$  ( $\epsilon$ ,  $\text{M}^{-1} \text{cm}^{-1}$ ) = 254 (93850), 324 (24650), 374 (11450), 394 (8090).  $^1\text{H}$

NMR spectrum (400 MHz, DMSO-d<sub>6</sub>):  $\delta$  = 8.44 (d,  $J$  = 10.1 Hz, 4H), 8.33 (t,  $J$  = 7.8 Hz, 1H), 8.03-7.91 (m, 6H), 7.88-7.77 (m, 4H), 7.51-7.38 (m, 6H), 2.03 (s, CH<sub>3</sub>CN). <sup>13</sup>C NMR spectrum (400 MHz, DMSO-d<sub>6</sub>): 168.79, 152.59, 144.01, 132.10, 131.92, 131.16, 129.65, 128.61, 128.32, 128.19, 127.92, 126.29, 126.22, 126.04, 125.58, 125.42, 123.20.

### 3. Physical Measurements

Elemental analysis data were obtained from Elementar Analysen Systeme GmbH Vario EL-III instrument. The <sup>1</sup>H and <sup>13</sup>C NMR spectra were recorded with a JEOL 400 MHz instrument. The FTIR spectra (Zn–Se ATR) were recorded with a Perkin-Elmer Spectrum-Two spectrometer. The absorption spectra were recorded with a Perkin-Elmer Lambda-25 spectrophotometer. Fluorescence spectral studies were performed with a Cary Eclipse fluorescence spectrophotometer. Time-resolved fluorescence spectra were recorded using a picosecond Fluorimeter from Horiba JobinYvon (FluoroHub). All UV-visible and fluorescence spectra were recorded with a 1.0 cm path length cuvette. The circular dichroism (CD) spectral measurements were recorded on Jasco spectropolarimeter (J815, Japan) equipped with peltier accessory. The spectrometer was sufficiently purged with 99.9% dry nitrogen before the CD measurements. The spectra were collected at a scan rate speed of 50 nm min<sup>-1</sup> with a response time of 1 s. Each spectrum was baseline corrected and the final plot was taken as an average of three accumulated plots in the range of 200 nm–300 nm. ESI<sup>+</sup>-MS mass spectra were obtained with a Q-TOF LC/MS Agilent mass spectrometer whereas ESI-MS mass spectra was recorded with Bruker micrOTOF<sup>TM</sup>-Q II. Docking studies were performed using the Hex 6 software.

### 4. X-ray Crystallography

Single crystals suitable for the X-ray diffraction studies were grown by the slow evaporation of a CH<sub>3</sub>CN solution of complex **4**. The intensity data were collected at 298 K with an Oxford XCalibur CCD diffractometer equipped with graphite monochromatic Mo- $K\alpha$  radiation ( $\lambda$  = 0.71073 Å).<sup>4</sup> Data reduction was performed with the CrysAllisPro program (Oxford Diffraction ver. 171.34.40).<sup>4</sup> The structure was solved by direct methods using SIR-92 program<sup>5</sup> and refined on  $F^2$  using all data by full matrix least-squares procedures with SHELXL-2014/7<sup>6</sup>The hydrogen atoms were placed at the calculated positions and included in the last cycles of the refinement. All calculations were done using the WinGX software package.<sup>7</sup> Crystallographic data collection

and structure solution parameters are summarized in Table S1. CCDC-1522061 contains the supplementary crystallographic data for this paper. This data can be obtained free of charge from The Cambridge Crystallographic Data Center via [www.ccdc.cam.ac.uk/data\\_request/cif](http://www.ccdc.cam.ac.uk/data_request/cif).

## 5. Determination of Stern-Volmer Constant ( $K_{SV}$ ) and Binding Constant ( $K_b$ )

Stern-Volmer constant ( $K_{SV}$ ) were computed by the Stern–Volmer equation (1)<sup>8</sup> where,  $I_0$  and  $I$  are the emission in the absence and in the presence of complexes **1-4** used as the quencher (Q).

The binding constant ( $K_b$ ) was computed by the Benesi-Hildebrand equation (2)<sup>9</sup> where  $I$ ,  $I_0$  and  $I_{min}$  are the emission intensities of  $\text{Na}^+\text{WR}^-$  in presence of complexes, in absence of complexes and minimum fluorescence intensity in presence of complexes, respectively.  $K_b$  value was obtained by the ratio of intercept and slope in  $1/(I-I_0)$  vs.  $1/[\mathbf{1-4}]$  plots.

$$I_0/I = 1 + K_{SV}[\mathbf{1-4}] \quad (1)$$

$$1/(I-I_0) = 1/\{K_b(I_0 - I_{min})[\mathbf{1-4}]\} + 1/(I_0 - I_{min}) \quad (2)$$

## 6. Determination of Detection Limit

**From fluorescence spectral titration:** The detection limit was calculated according to equation (3)<sup>10</sup> where,  $k$  is the slope of a plot of emission of  $\text{Na}^+\text{WR}^-$  versus concentration of complexes **1-4** and  $\sigma$  is the standard deviation of ten blank replicate fluorescence measurements of  $\text{Na}^+\text{WR}^-$ .

$$\text{Detection limit: } 3\sigma/k \quad (3)$$

**From UV-visible spectral titration:** The detection limit for the detection of  $\text{Na}^+\text{WR}^-$  by Pd(II) complexes **3** and **4** in  $\text{CH}_3\text{CN}$  and in HEPES buffer was calculated according to equation (4)<sup>11</sup> where,  $k'$  is the slope of a plot of absorbance of Pd(II) complexes **3** or **4** versus concentration of  $\text{Na}^+\text{WR}^-$  and  $\sigma'$  is the standard deviation of ten blank replicate UV-visible measurements of complexes.

$$\text{Detection limit: } 3\sigma'/k' \quad (4)$$

## 7. References

1. P. Kumar, V. Kumar and R. Gupta, *RSC Adv.*, 2015, **5**, 97874.
2. A. N. Dwyer, M. C. Grossel and P. N. Horton, *Supramol. Chem.*, 2004, **16**, 405.
3. Q.-Q. Wang, R. A. Begum and V. W. Day, *J. Am. Chem. Soc.*, 2013, **135**, 17193.
4. CrysAlisPro, v. 1.171.33.49b, Oxford Diffraction Ltd., 2009.
5. A. Altomare, G. Cascarano, C. Giacovazzo and A. Guagliardi, *J. Appl. Crystallogr.*, 1993, **26**, 343-350.
6. Sheldrick, G. M. *SHELXL-2014/7: Program for the solution of crystal structures*, University of Gottingen, Gottingen, Germany, 2014.
7. Farrugia, L. J. WinGX, v. 1.70, An Integrated System of Windows Programs for the Solution, Refinement and Analysis of Single-Crystal X-ray Diffraction Data, Department of Chemistry, University of Glasgow, 2003.
8. A. Ganguly, B. K. Paul, S. Ghosh, S. Kar and N. Guchhait, *Analyst*, 2013, **138**, 6532.
9. H. A. Benesi and J. H. Hildebrand, *J. Am. Chem. Soc.*, 1949, **71**, 2703.
10. A. Senthilvelan, I. Ho, K. Chang, G. Lee, Y. Liu and W. Chung, *Chem.–Eur. J.*, 2009, **15**, 6152.
11. S. Goswami, K. Aich, S. Das, A. K. Das, A. Manna and S. Halder, *Analyst*, 2013, **138**, 1903.

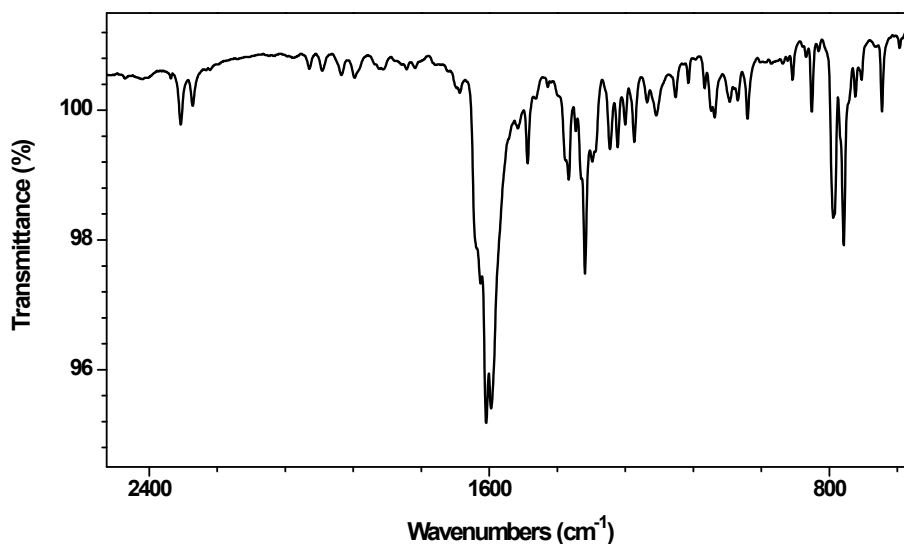

**Figure S1.** FTIR spectrum of complex 2.

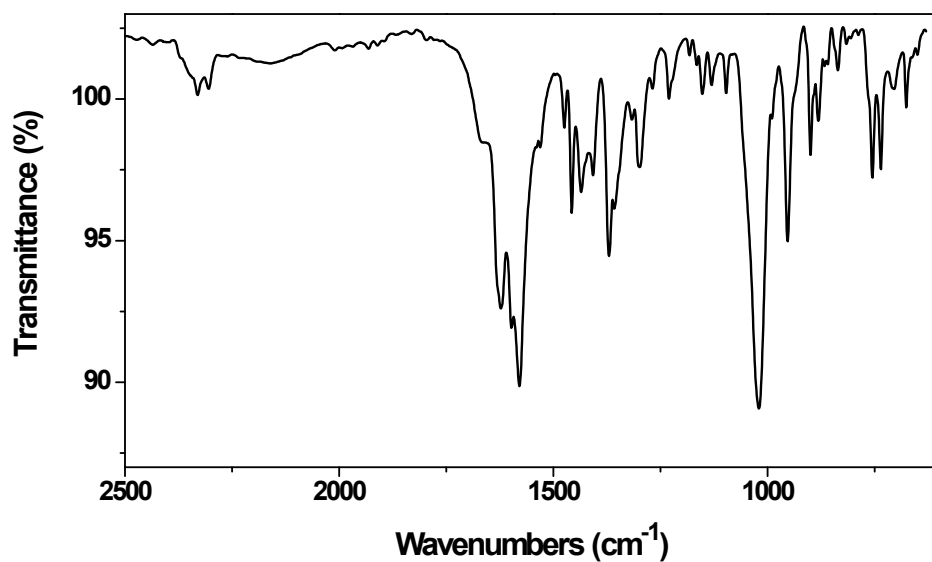

**Figure S2.** FTIR spectrum of complex 4.

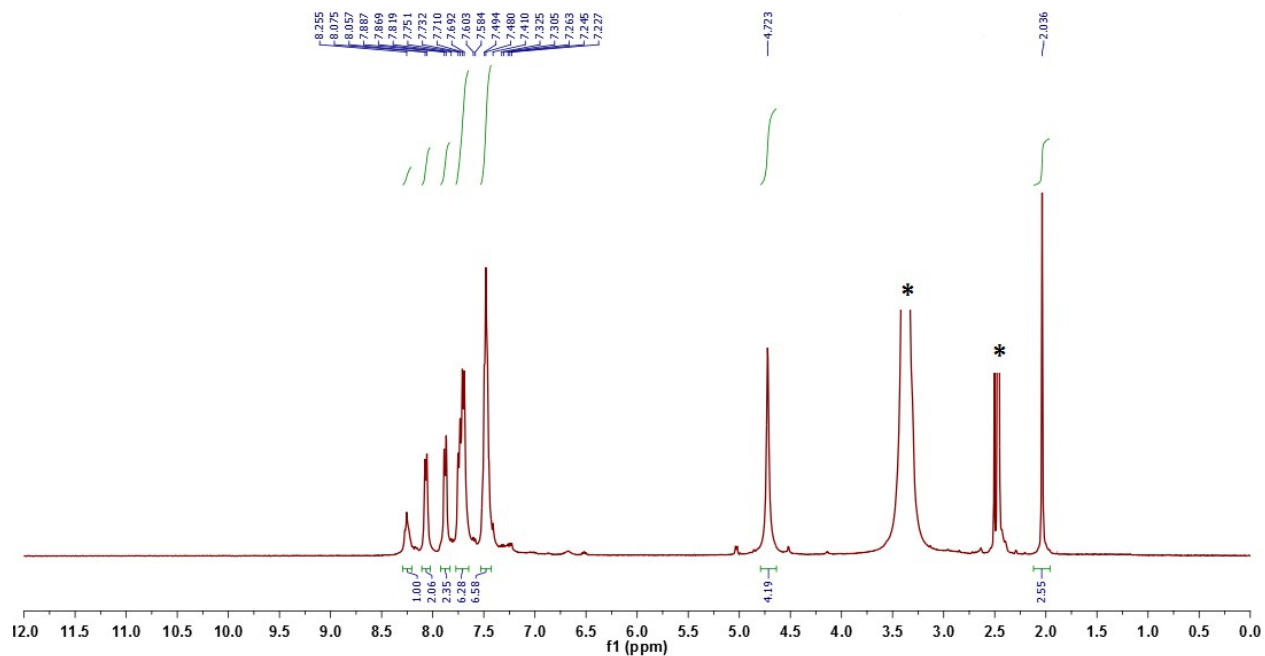

**Figure S3.**  $^1\text{H}$  NMR spectrum of complex 2 in  $\text{DMSO-d}_6$  where \* represents the residual solvent and/or adventitious water peak(s).

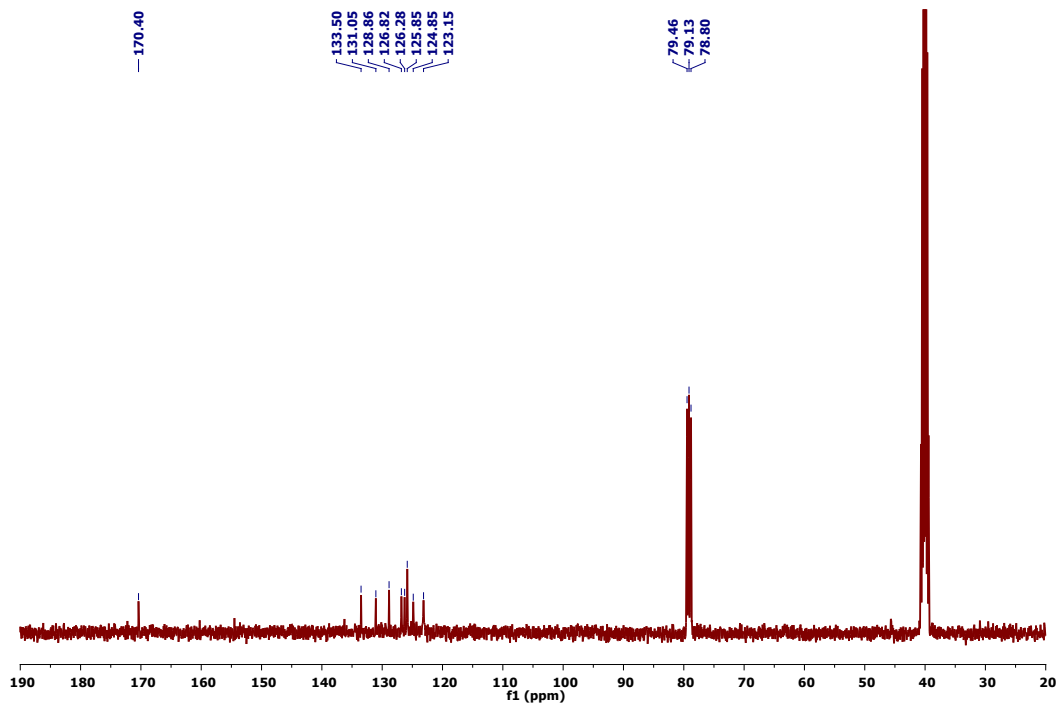

**Figure S4.**  $^{13}\text{C}$  NMR spectrum of complex **2** in  $\text{DMSO-d}_6$ .

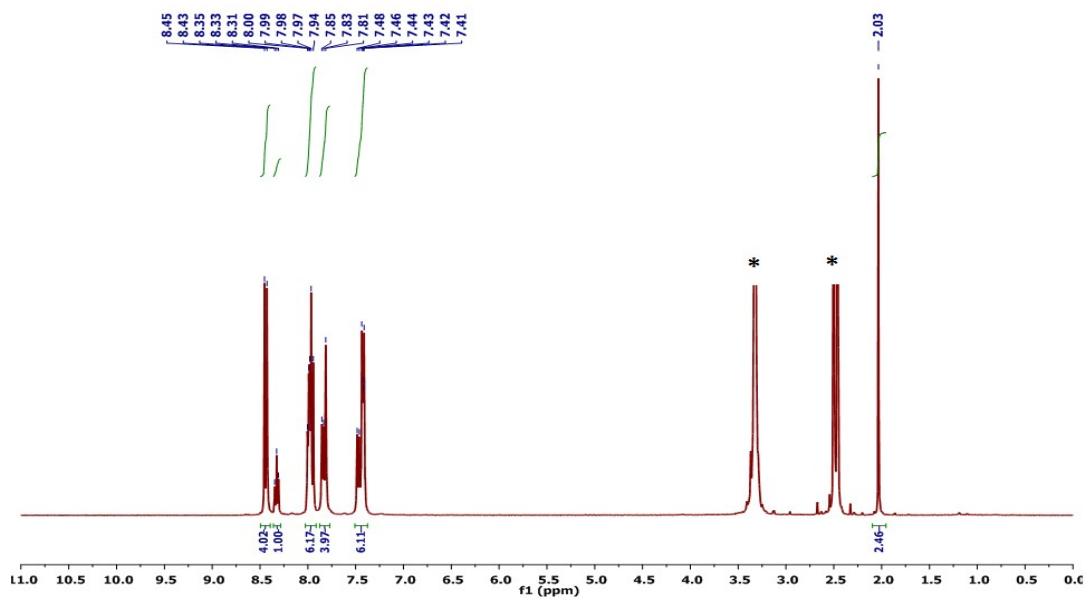

**Figure S5.**  $^1\text{H}$  NMR spectrum of complex **4** in  $\text{DMSO-d}_6$  where \* represents the residual solvent and/or adventitious water peak(s).

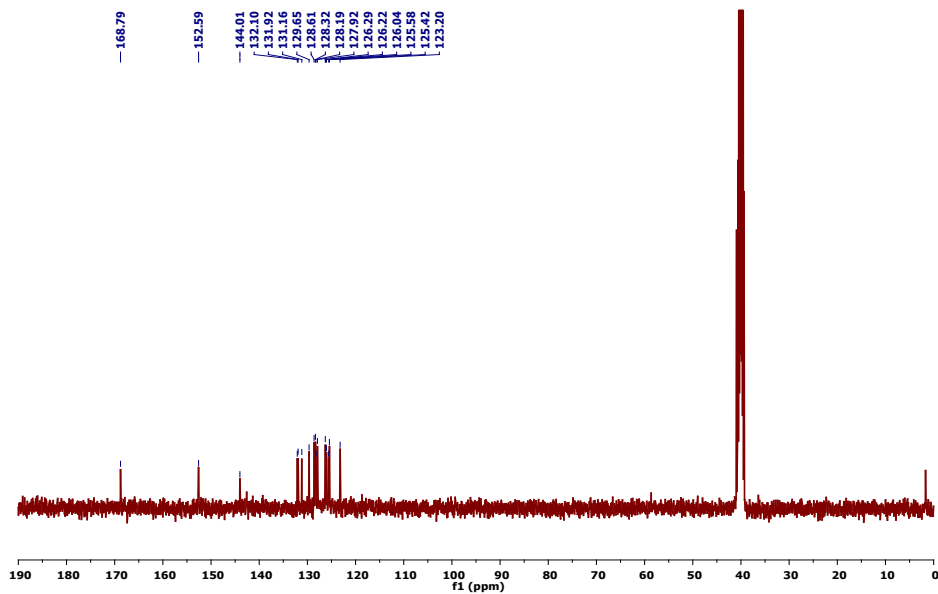

Figure S6.  $^{13}\text{C}$  NMR spectrum of complex **4** in  $\text{DMSO-d}_6$ .

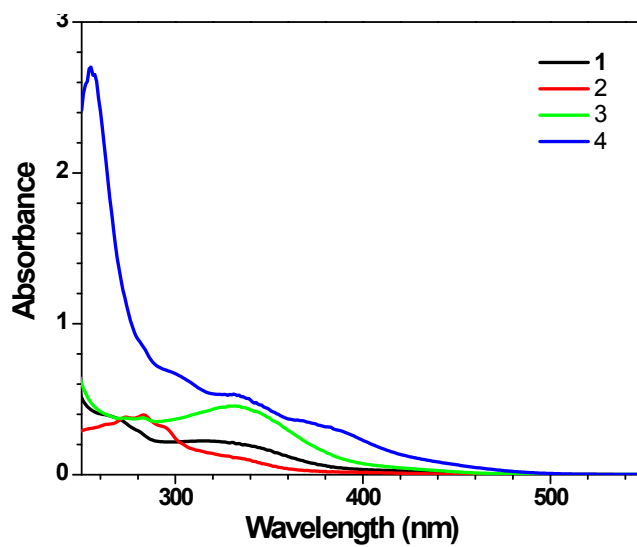

Figure S7. UV-visible spectra of complexes **1-4** recorded in  $\text{CH}_3\text{CN}$  ( $20\ \mu\text{M}$ ).

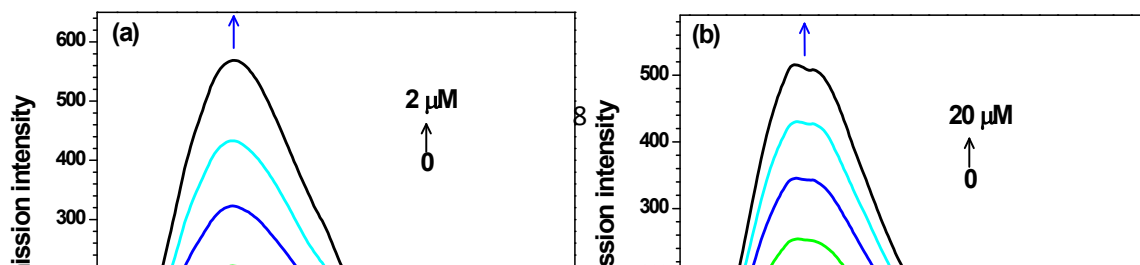



**Figure S8.** Change in emission intensity of  $\text{Na}^+\text{WR}^-$  in  $\text{CH}_3\text{CN}$  ( $\lambda_{\text{ex}} = 320 \text{ nm}$ ) and in HEPES buffer (10 mM, pH = 7.4) ( $\lambda_{\text{ex}} = 310 \text{ nm}$ ).

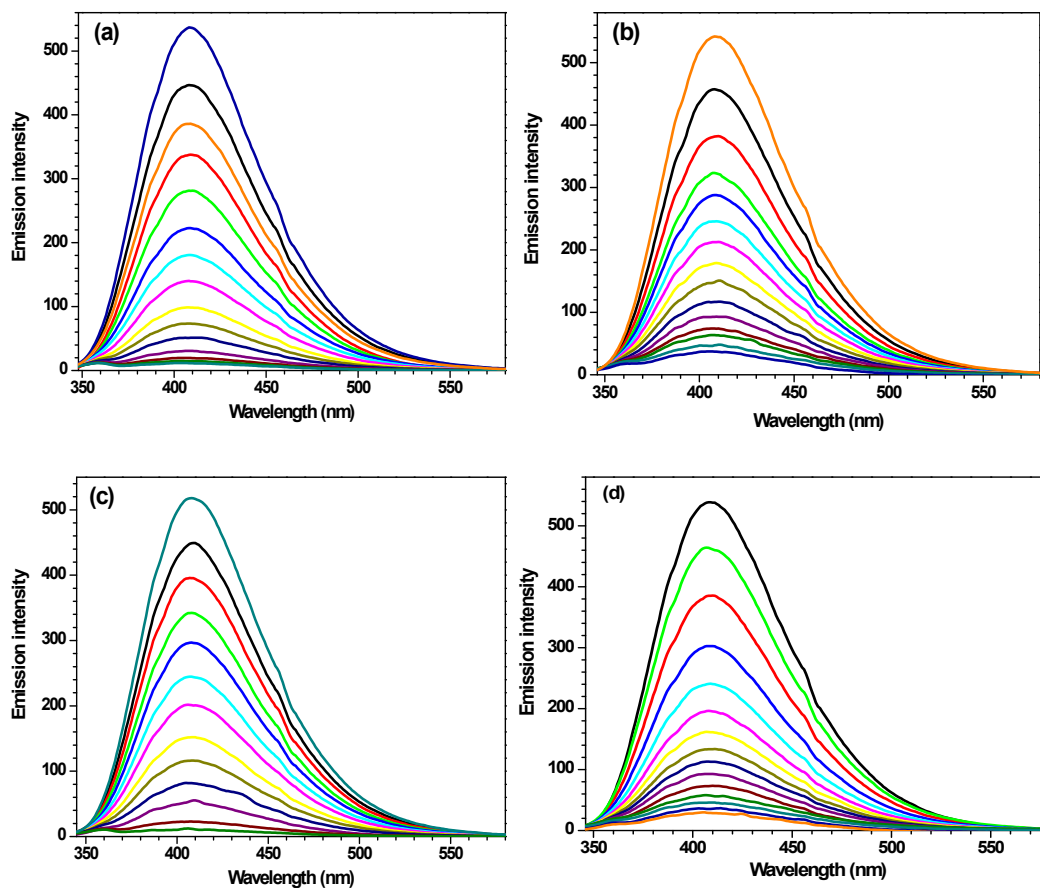

**Figure S9.** Emission spectra of  $\text{Na}^+\text{WR}^-$  (2  $\mu\text{M}$ ) and after its interaction with Pd(II) complexes (0-2.8  $\mu\text{M}$ ) (a) **1**; (b) **2**; (c) **3** and (d) **4** in  $\text{CH}_3\text{CN}$  ( $\lambda_{\text{ex}} = 320 \text{ nm}$ ).

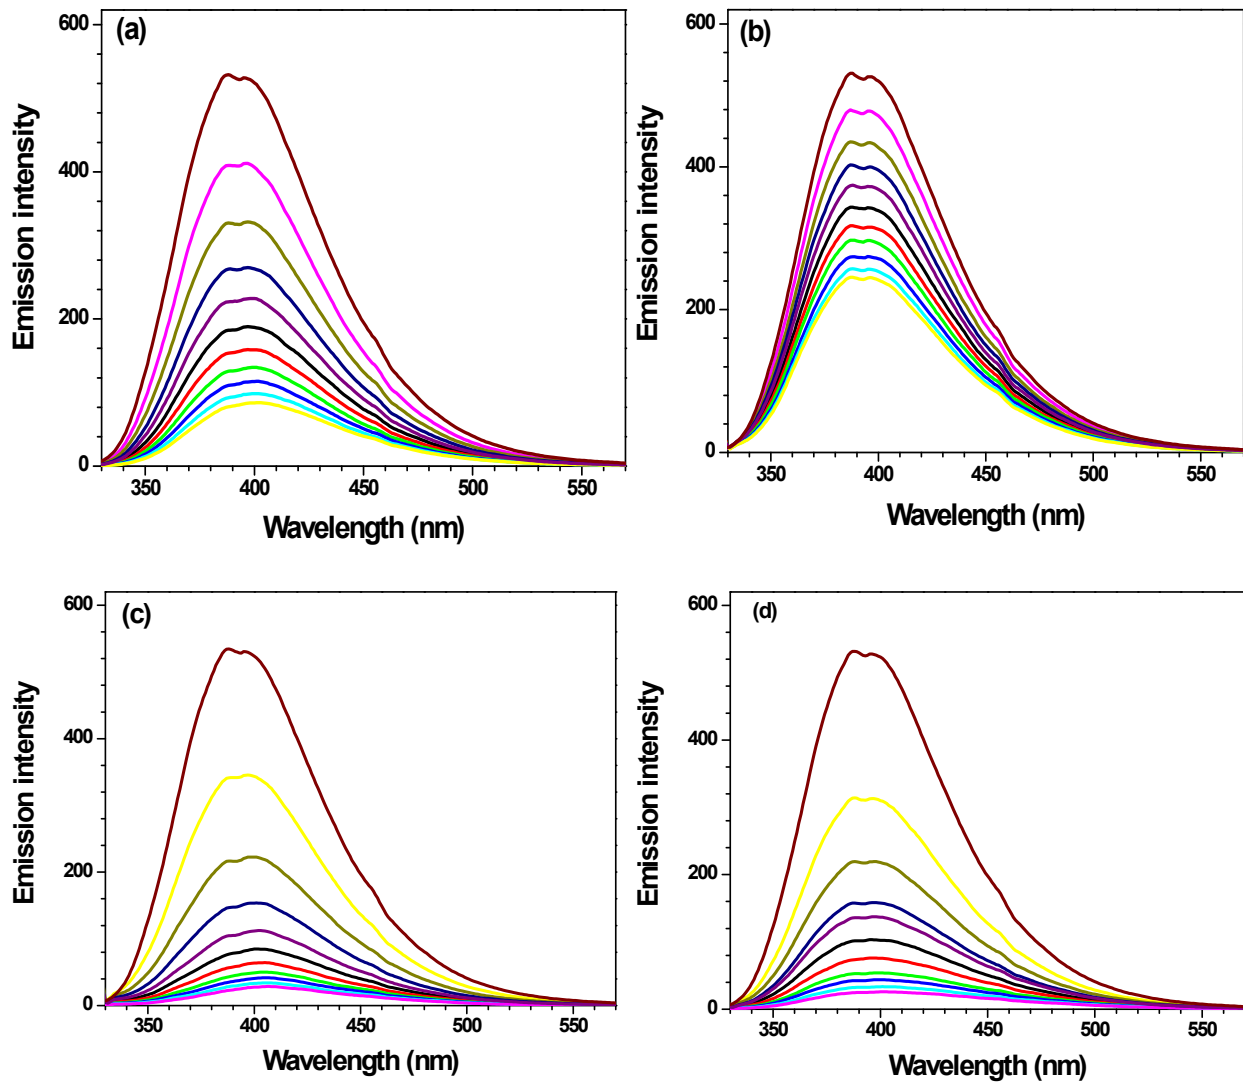

**Figure S10.** Emission spectra of  $\text{Na}^+\text{WR}^-$  ( $20 \mu\text{M}$ ) and after its interaction with  $\text{Pd}(\text{II})$  complexes ( $0\text{-}200 \mu\text{M}$ ) (a) **1**; (b) **2**; (c) **3** and (d) **4** in HEPES buffer ( $10 \text{ mM}$ ,  $\text{pH} = 7.4$ ) ( $\lambda_{\text{ex}} = 310 \text{ nm}$ ).

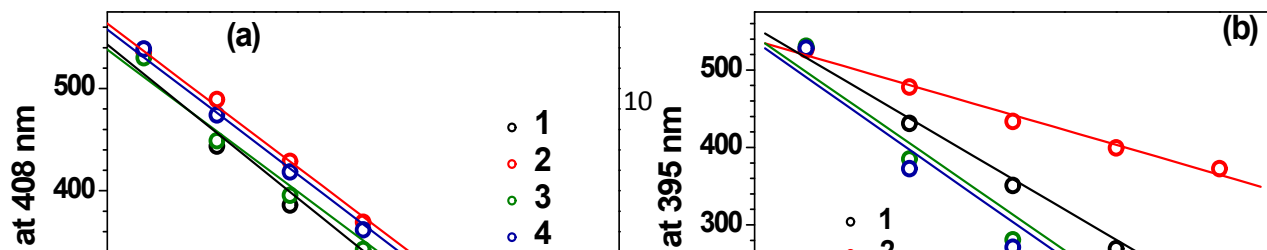

**Figure S11.** Determination of detection limit of (a)  $\text{Na}^+\text{WR}^-$  ( $2\ \mu\text{M}$ ) with Pd(II) complexes **1-4** (concentration was linear from 0 –  $1.2\ \mu\text{M}$ ) in  $\text{CH}_3\text{CN}$ . (b)  $\text{Na}^+\text{WR}^-$  ( $20\ \mu\text{M}$ ) towards Pd(II) complexes **1-4** (concentration was linear from 0 –  $100\ \mu\text{M}$ ) in HEPES buffer ( $10\ \text{mM}$ ,  $\text{pH} = 7.4$ ).

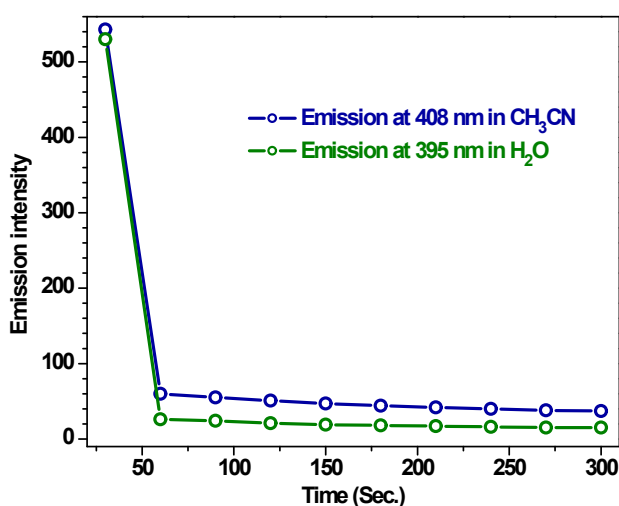

**Figure S12.** Time-dependent emission intensity of  $\text{Na}^+\text{WR}^-$  ( $2\ \mu\text{M}$  in  $\text{CH}_3\text{CN}$ ,  $20\ \mu\text{M}$  in buffer) in  $\text{CH}_3\text{CN}$  and in HEPES buffer ( $10\ \text{mM}$ ,  $\text{pH} = 7.4$ ) as a function of concentration of complex **4**. Points at 0 second represent the emission of only  $\text{Na}^+\text{WR}^-$  without the addition of complex **4**.

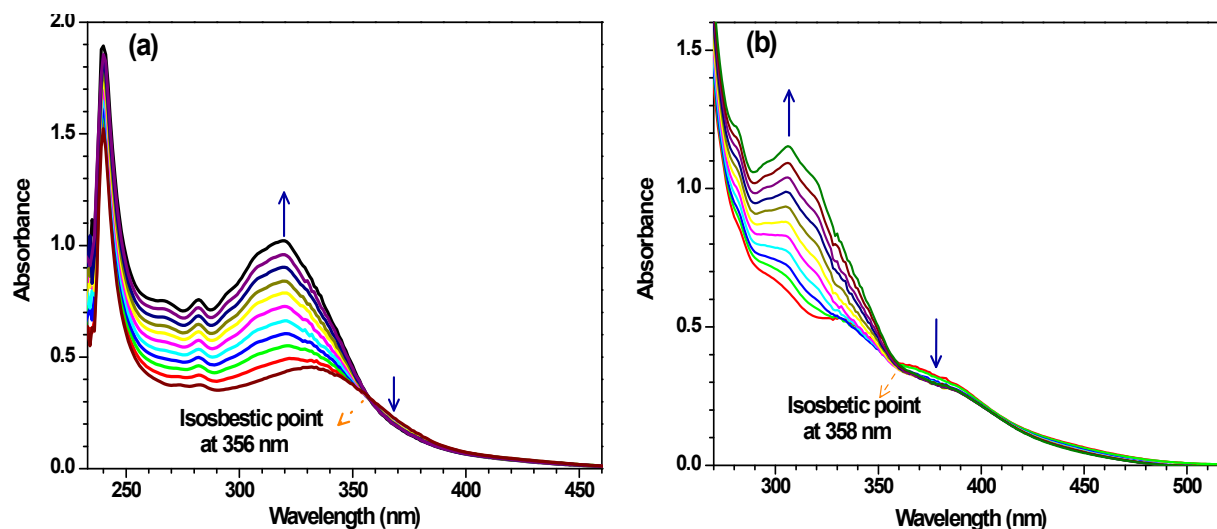

**Figure S13.** Change in absorbance of Pd(II) complexes (a) **3** (20  $\mu\text{M}$ ) and (b) **4** (20  $\mu\text{M}$ ) in presence of  $\text{Na}^+\text{WR}^-$  (0 – 50  $\mu\text{M}$ ) in  $\text{CH}_3\text{CN}$ .

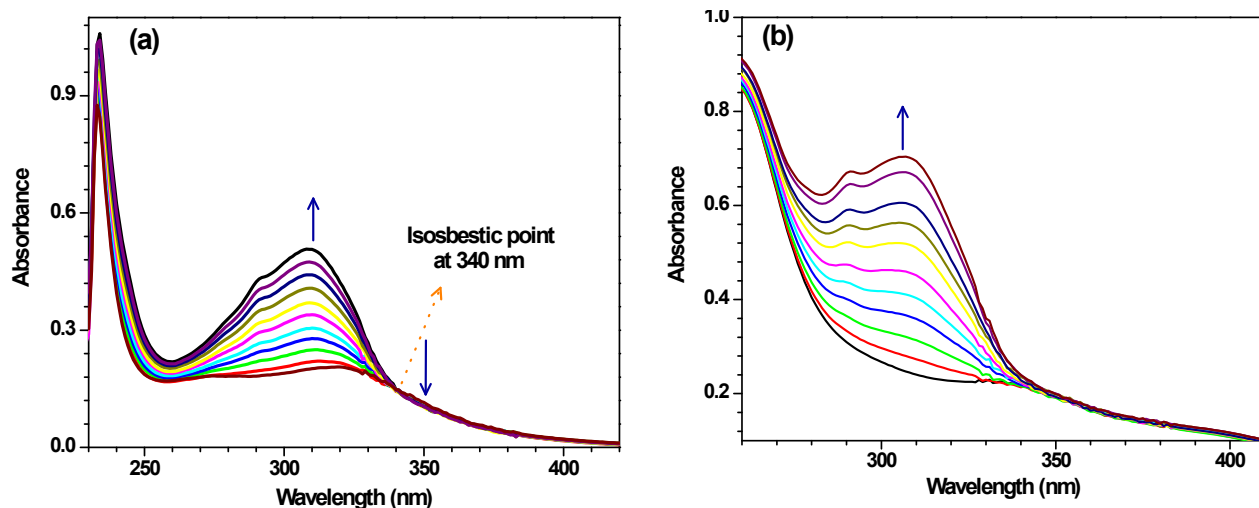

**Figure S14.** Change in absorbance of Pd(II) complexes (a) **3** (10  $\mu\text{M}$ ) and (b) **4** (10  $\mu\text{M}$ ) in presence of  $\text{Na}^+\text{WR}^-$  (0 - 25  $\mu\text{M}$ ) in HEPES buffer (10 mM, pH = 7.4).

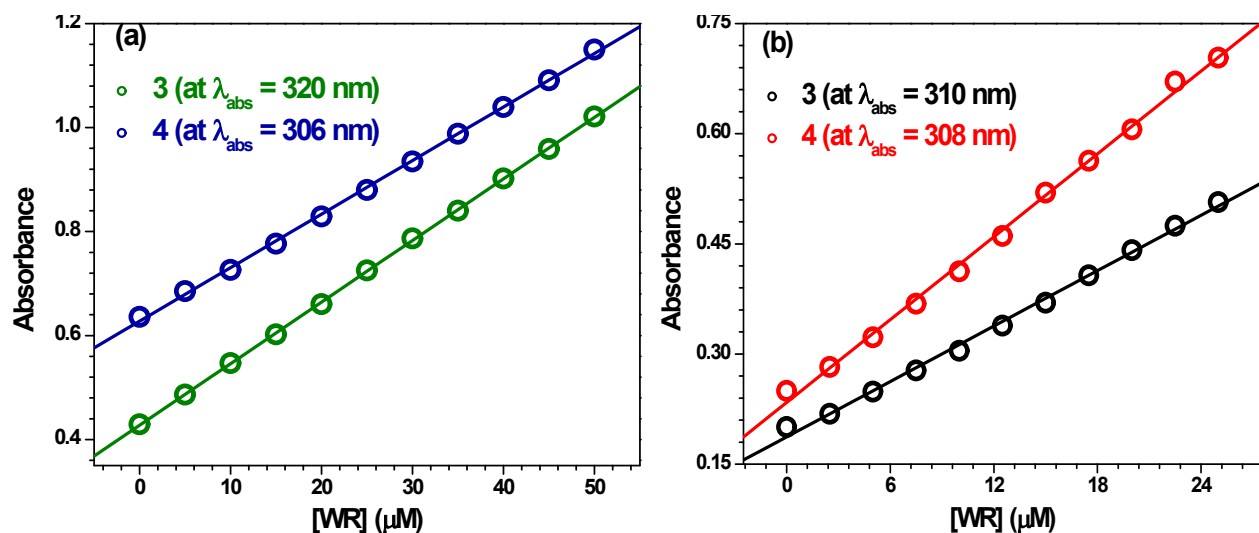

**Figure S15.** Determination of detection limit of  $\text{Na}^+\text{WR}^-$  by UV-visible titration of (a) Pd(II) complexes **3** (20  $\mu\text{M}$ ) and **4** (20  $\mu\text{M}$ ) by  $\text{Na}^+\text{WR}^-$  (0– 50  $\mu\text{M}$ ) in  $\text{CH}_3\text{CN}$ . (b) Pd(II) complexes **3**

(10  $\mu\text{M}$ ) and **4** (10  $\mu\text{M}$ ) by  $\text{Na}^+\text{WR}^-$  (0–25  $\mu\text{M}$ ) in HEPES buffer (10 mM, pH = 7.4).

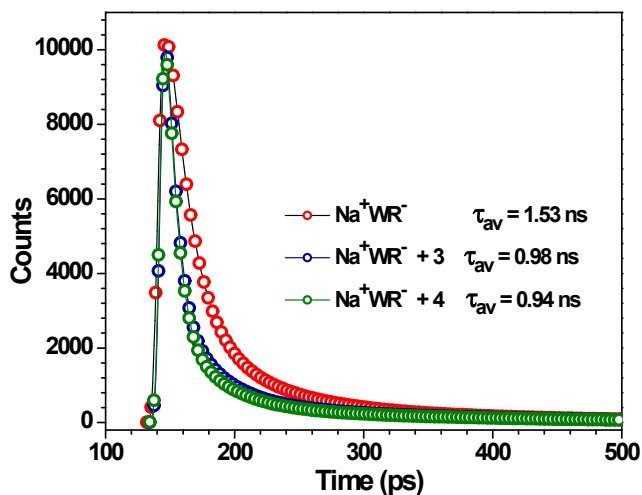

**Figure S16.** Lifetime profile of  $\text{Na}^+\text{WR}^-$  in absence and presence of Pd(II) complexes **3** and **4** (5 equiv.) in  $\text{CH}_3\text{CN}$  ( $\lambda_{\text{ex}} = 280$  nm,  $\lambda_{\text{em}} = 395$  nm).

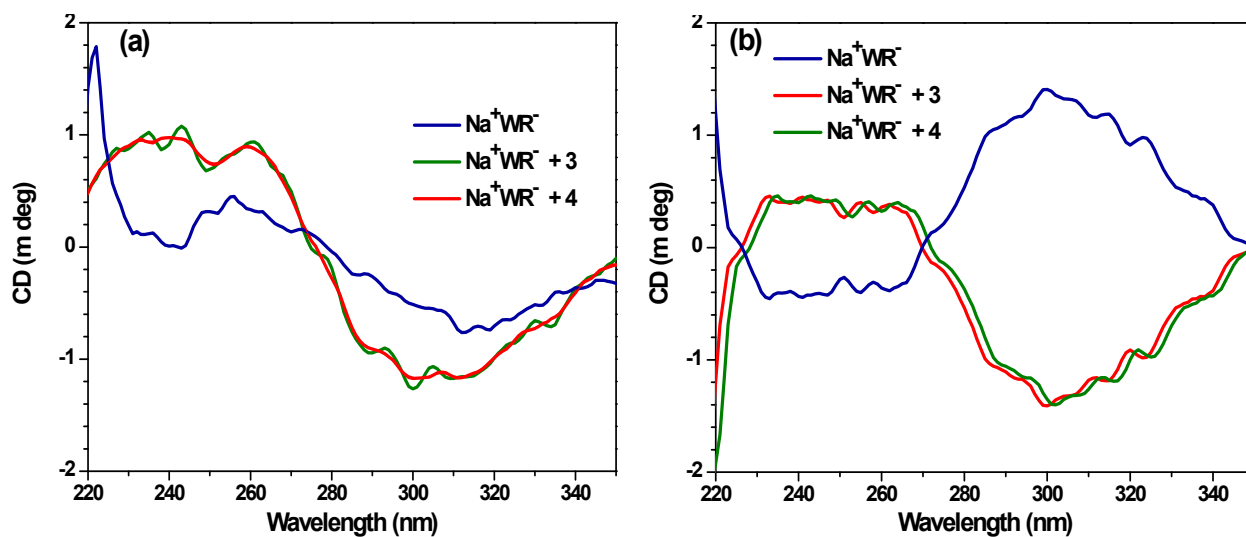

**Figure S17.** (a) Circular dichroism spectra of  $\text{Na}^+\text{WR}^-$  (100  $\mu\text{M}$ ) in absence and presence of Pd(II) complexes **3** and **4** (5 equiv.) in  $\text{CH}_3\text{CN}$ . (b) Circular dichroism spectra of  $\text{Na}^+\text{WR}^-$  (35  $\mu\text{M}$ ) in absence and presence of Pd(II) complexes **3** and **4** (5 equiv.) in  $\text{CH}_3\text{CN}$ .

$\mu\text{M}$ ) in absence and presence of complexes **3** and **4** (10 equiv.) in HEPES buffer (10 mM, pH = 7.4).

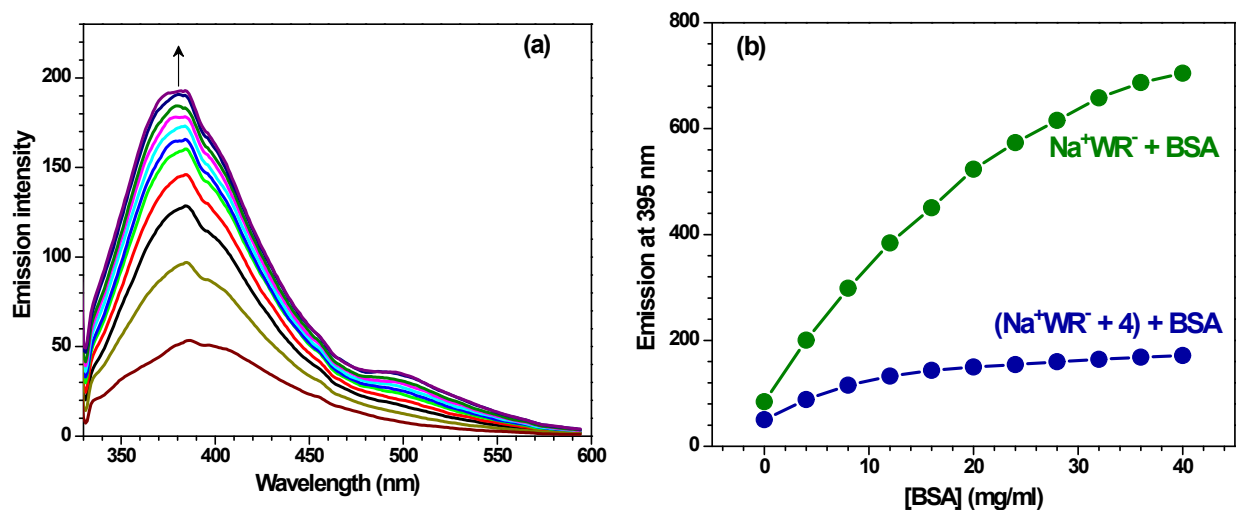

**Figure S18.** (a) Change in emission intensity of  $\text{Na}^+\text{WR}^-$ +complex **4** ( $2\ \mu\text{M}$ ,  $20\ \mu\text{M}$ ) in presence of BSA (0–40 mg/mL). (b) Change in emission intensity of  $\text{Na}^+\text{WR}^-$  ( $2\ \mu\text{M}$ ) in presence of BSA (0–40 mg/mL) and  $\text{Na}^+\text{WR}^-$ +complex **4** ( $2\ \mu\text{M}$ ,  $20\ \mu\text{M}$ ) in presence of BSA (0–40 mg/mL) in HEPES buffer (10 mM, pH = 7.4).

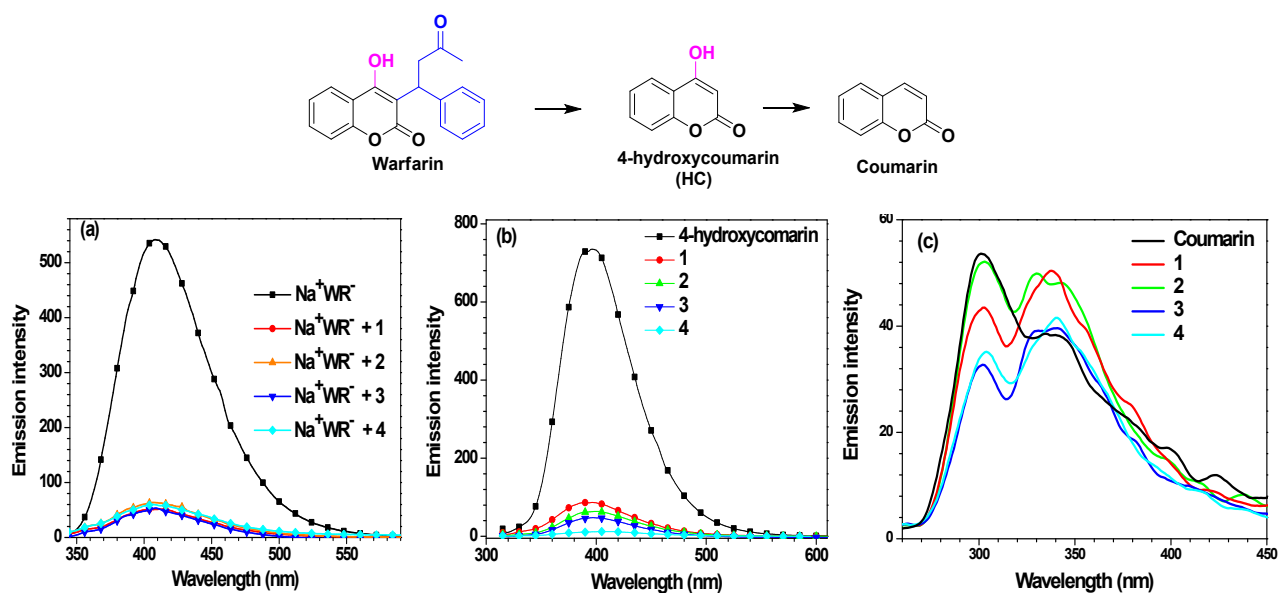

**Figure S19** (a) Emission spectra of  $\text{Na}^+\text{WR}^-$  ( $2 \mu\text{M}$ ) and after its interaction with complexes **1-4** ( $2 \mu\text{M}$ ) in  $\text{CH}_3\text{CN}$ . (b) Emission spectra of 4-hydroxycoumarin ( $50 \mu\text{M}$ ) in absence and in presence of complexes **1-4** ( $50 \mu\text{M}$ ) in  $\text{CH}_3\text{CN}$  ( $\lambda_{\text{ex}} = 300 \text{ nm}$ ). (c) Emission spectra of coumarin ( $10 \mu\text{M}$ ) in absence and in presence of complexes **1-4** ( $10 \mu\text{M}$ ) in  $\text{CH}_3\text{CN}$  ( $\lambda_{\text{ex}} = 225 \text{ nm}$ ).

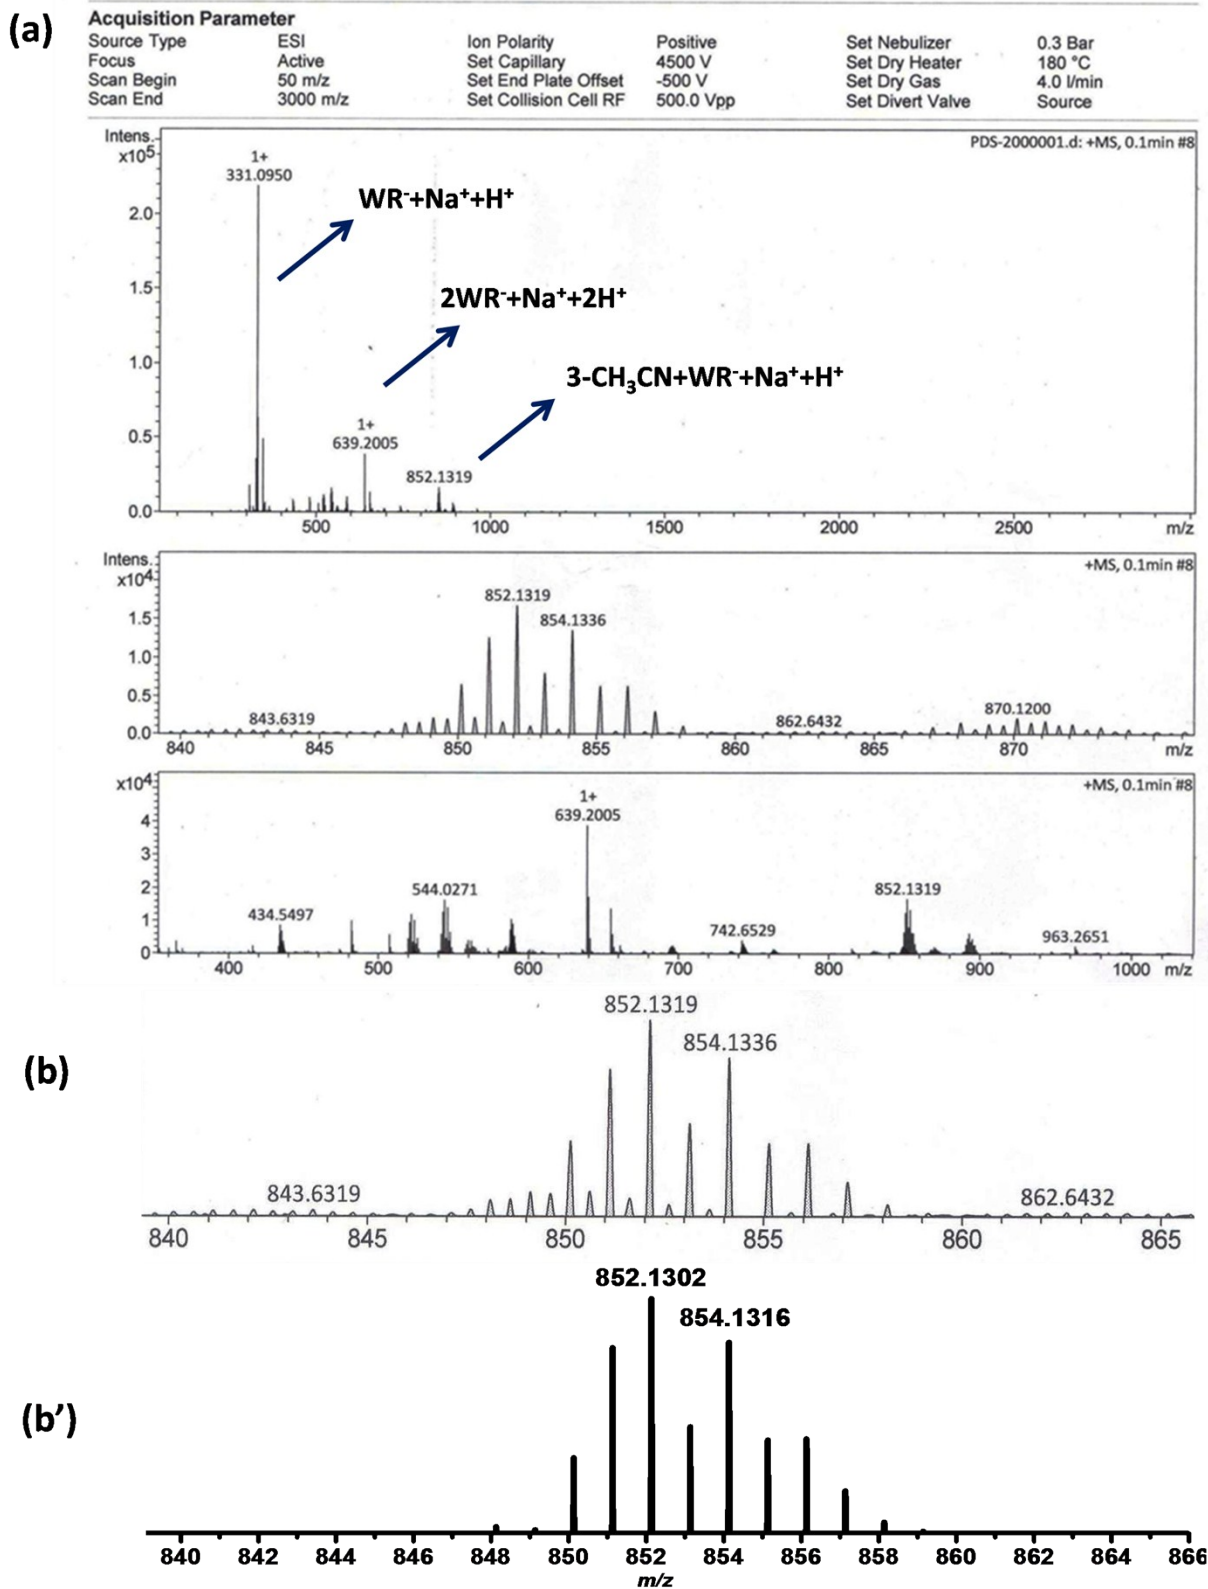

**Figure S20.** (a) ESI<sup>+</sup>-MS spectra of a mixture of complex **3** and Na<sup>+</sup>WR<sup>-</sup> in CH<sub>3</sub>CN. b and b' are isotopic patterns at  $m/z = 852$  and its simulation, respectively.



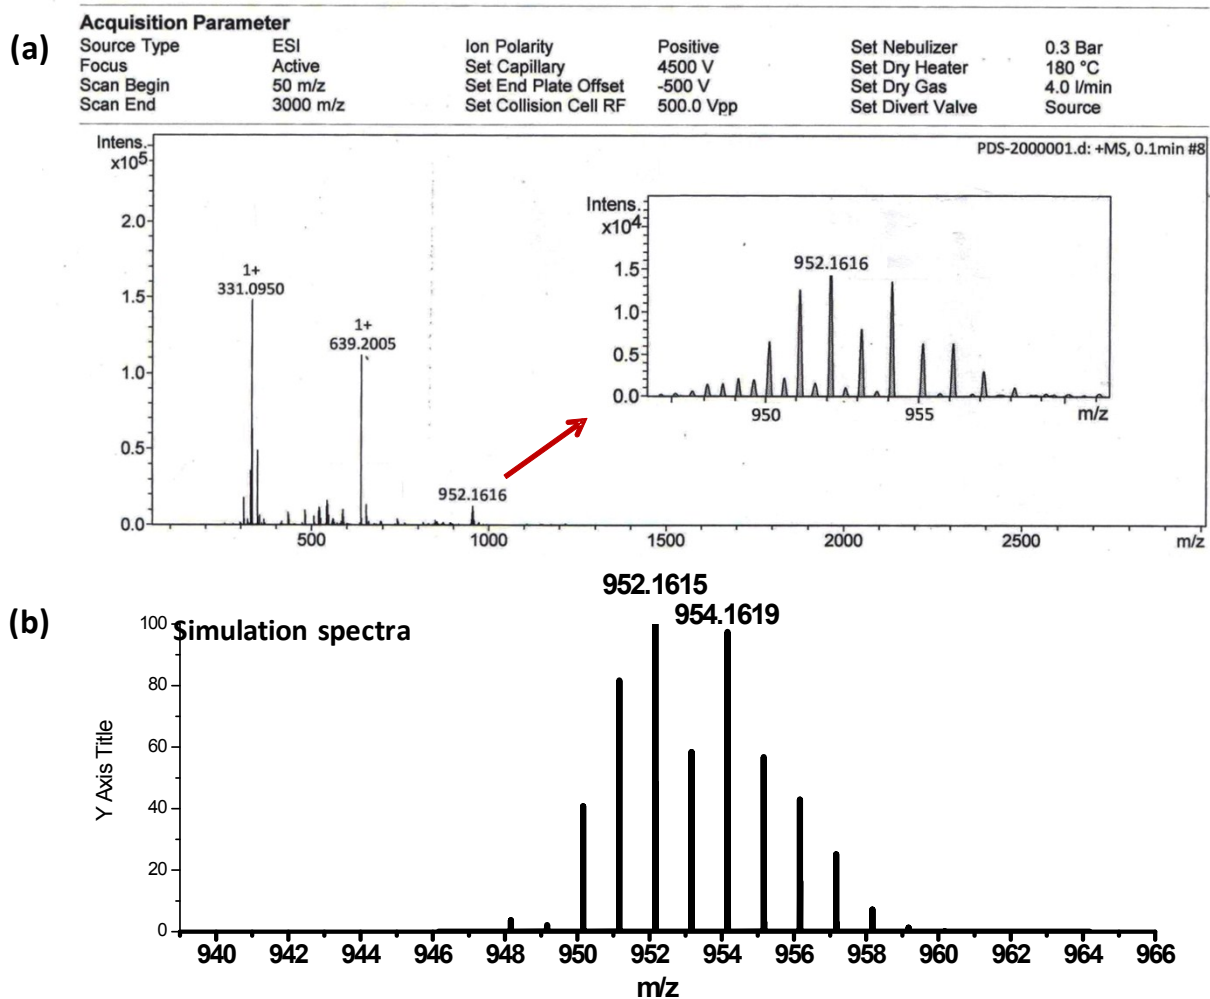

**Figure S21.** (a) ESI<sup>+</sup>-MS spectrum of a mixture of complex 4 and Na<sup>+</sup>WR<sup>-</sup> in CH<sub>3</sub>CN. (b) The corresponding simulation pattern.

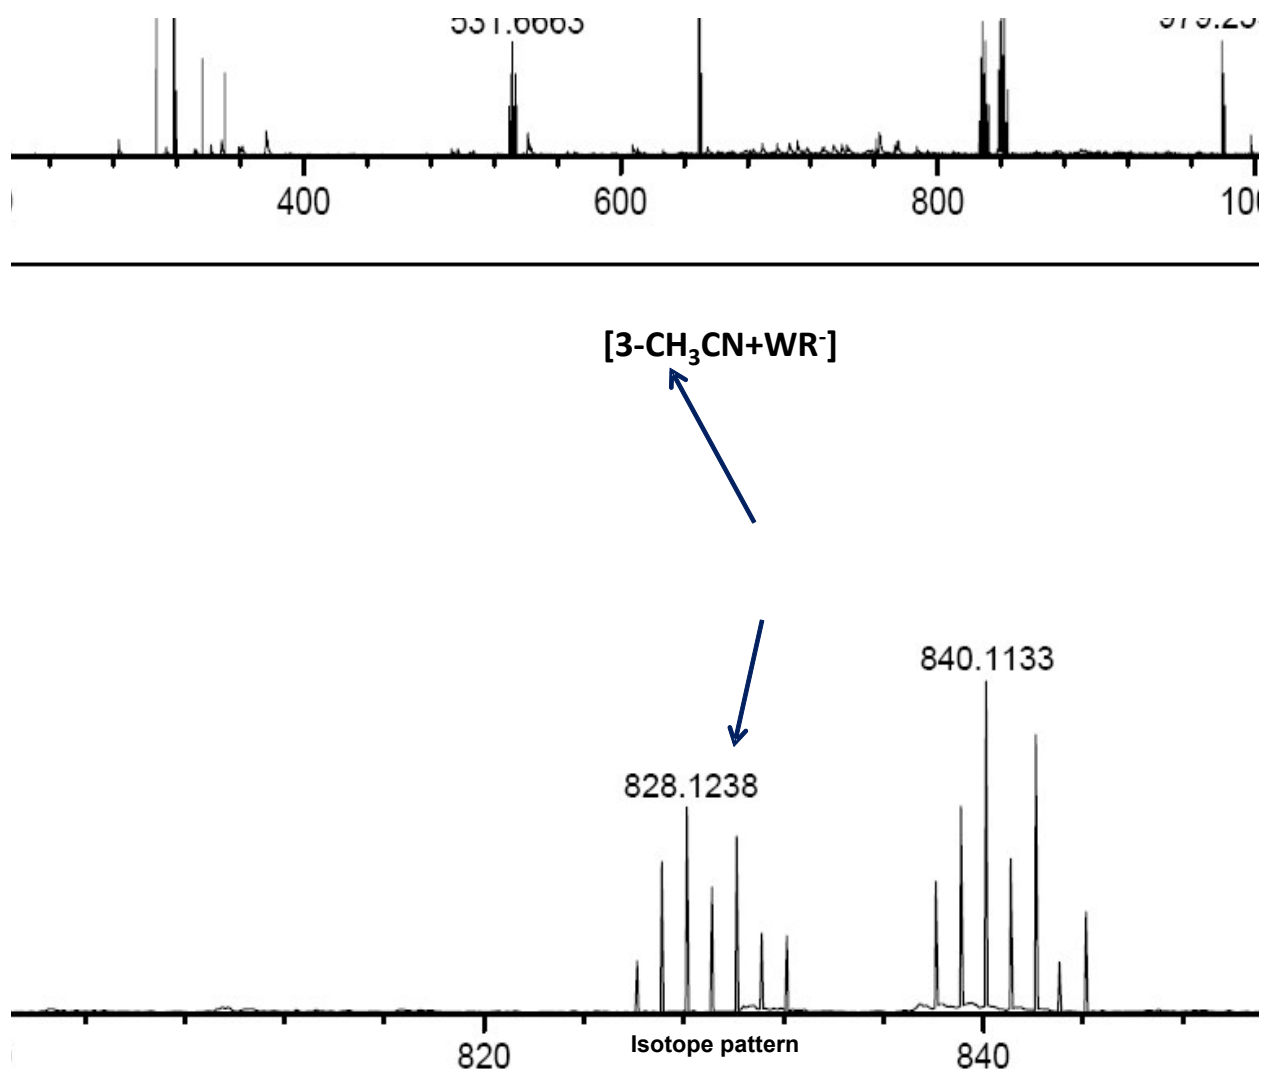

**Figure S22.** ESI<sup>-</sup>-MS spectrum of a mixture of complex **3** and Na<sup>+</sup>WR<sup>-</sup> in CH<sub>3</sub>CN along with its isotope distribution pattern and the corresponding simulated pattern for [3-CH<sub>3</sub>CN+WR<sup>-</sup>]<sup>-</sup>.

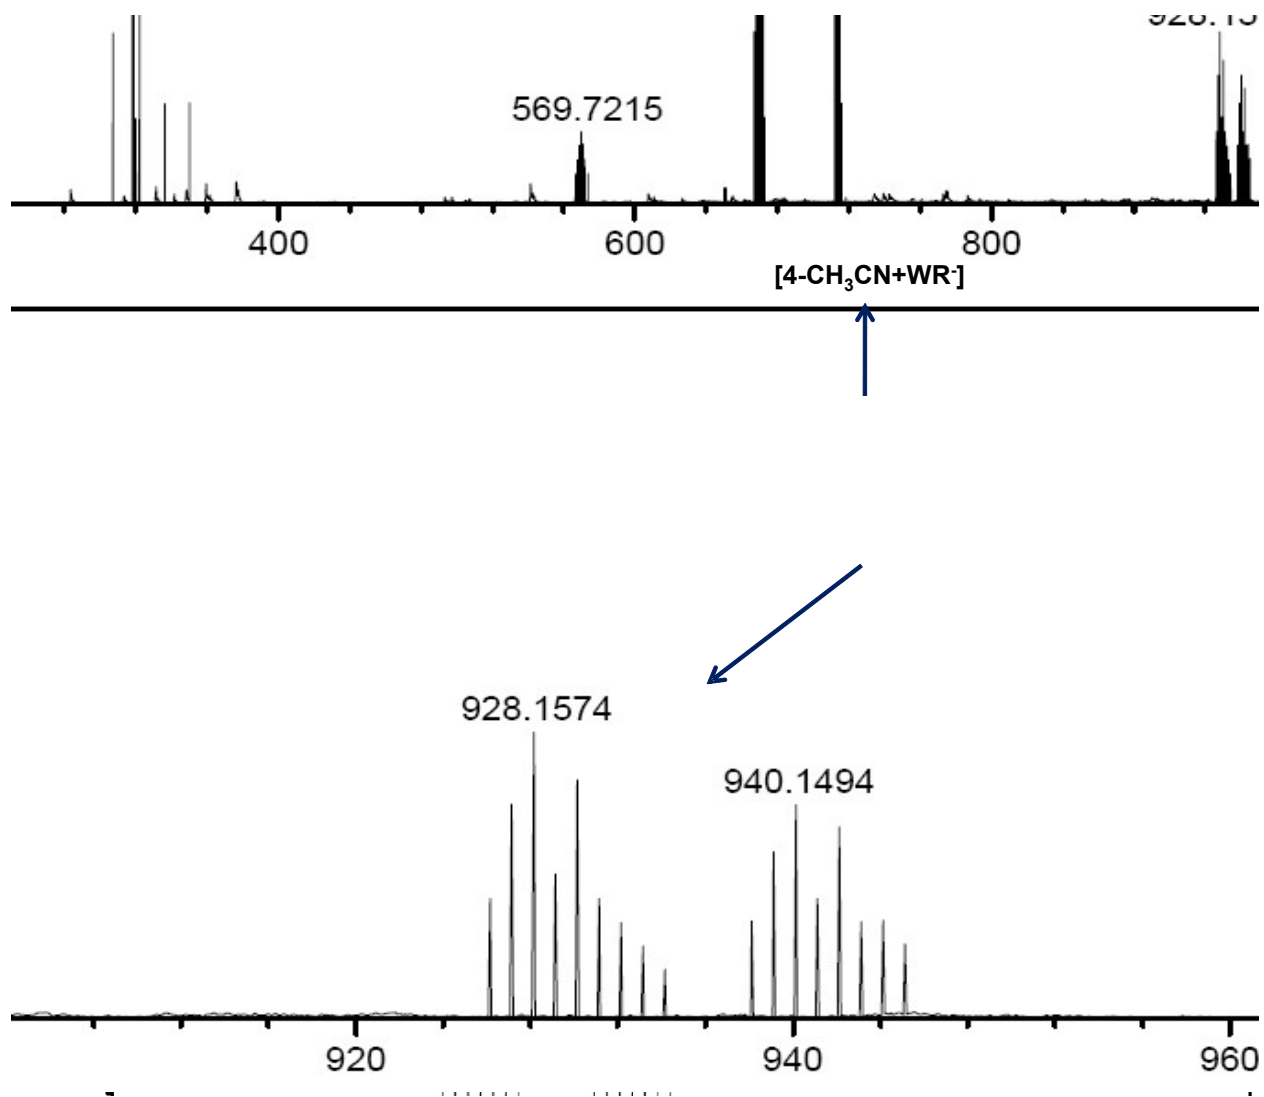

**Figure S23.** ESI-MS spectrum of a mixture of complex **4** and  $\text{Na}^+\text{WR}^-$  in  $\text{CH}_3\text{CN}$  along with its isotope distribution pattern and the corresponding simulated pattern for  $[4-\text{CH}_3\text{CN}+\text{WR}]^-$ .

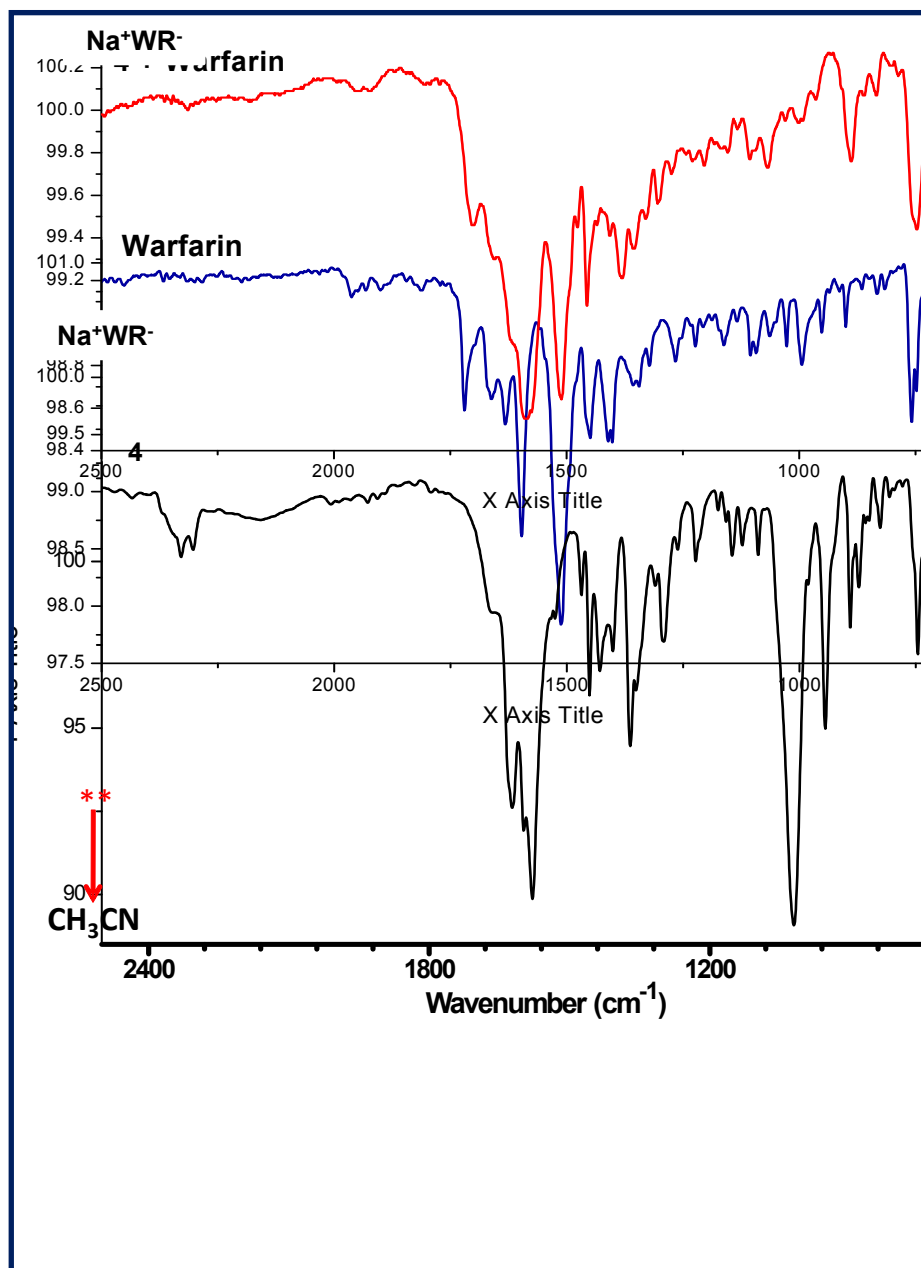

**Figure S24.** FTIR spectra of complex **4**, Na<sup>+</sup>WR<sup>-</sup> and the isolated product from the reaction between complex **4** and Na<sup>+</sup>WR<sup>-</sup>.

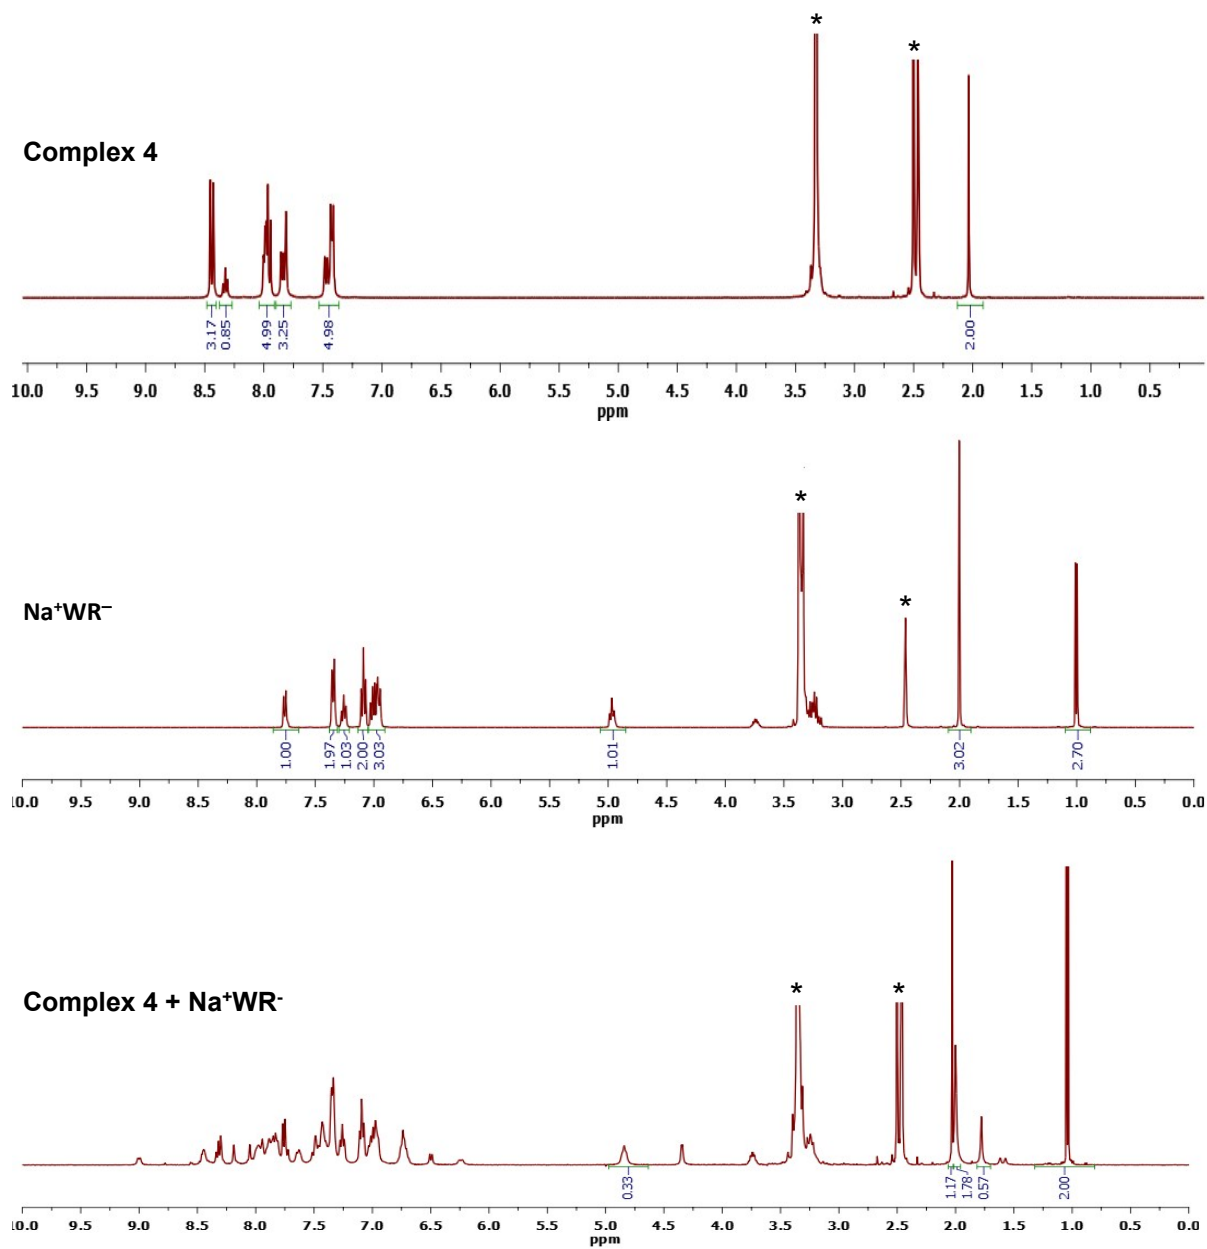

**Figure S25.**  $^1\text{H}$  NMR spectra of complex **4**,  $\text{Na}^+\text{WR}^-$  and complex **4** +  $\text{Na}^+\text{WR}^-$  in  $\text{DMSO-d}_6$  where \* represents the residual solvent and/or adventitious water peak(s).

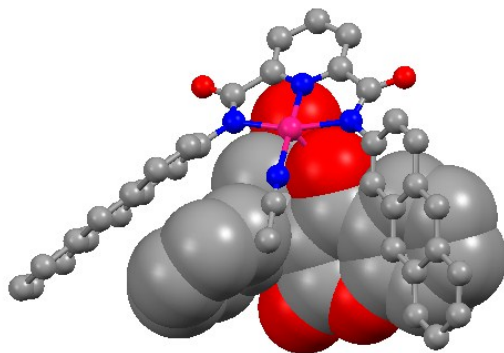

**Figure S26.** Ball-and-stick representation of docked structure of complex **4** with WR (shown in a space-fill representation).

**Table S1.** Stern-Volmer Constants ( $K_{SV}$ ), Detection Limits (DL) and binding Constants ( $K_b$ ) for  $\text{Na}^+\text{WR}^-$  with palladium complexes **1-4**.

| Species                                | $\text{CH}_3\text{CN}$       |         |                           | HEPES buffer (10 mM, $\text{pH} = 7.4$ ) |                      |                           |
|----------------------------------------|------------------------------|---------|---------------------------|------------------------------------------|----------------------|---------------------------|
|                                        | $K_{SV}$ ( $\text{M}^{-1}$ ) | DL (nM) | $K_b$ ( $\text{M}^{-1}$ ) | $K_{SV}$ ( $\text{M}^{-1}$ )             | DL ( $\mu\text{M}$ ) | $K_b$ ( $\text{M}^{-1}$ ) |
| <b>1</b> +<br>$\text{Na}^+\text{WR}^-$ | $2.92 \times 10^6$           | 3.18    | $5.48 \times 10^5$        | $2.60 \times 10^4$                       | 0.35                 | $0.109 \times 10^5$       |
| <b>2</b> +<br>$\text{Na}^+\text{WR}^-$ | $2.58 \times 10^6$           | 3.25    | $4.84 \times 10^5$        | $0.58 \times 10^4$                       | 0.72                 | $0.042 \times 10^5$       |
| <b>3</b> +<br>$\text{Na}^+\text{WR}^-$ | $3.18 \times 10^6$           | 3.14    | $5.69 \times 10^5$        | $5.19 \times 10^4$                       | 0.30                 | $0.212 \times 10^5$       |
| <b>4</b> +<br>$\text{Na}^+\text{WR}^-$ | $2.47 \times 10^6$           | 3.11    | $6.38 \times 10^5$        | $5.52 \times 10^4$                       | 0.29                 | $0.282 \times 10^5$       |

**Table S2.** Crystallographic data collection and structure solution parameters for complex **4**.

|                                           |                                                           |
|-------------------------------------------|-----------------------------------------------------------|
| Empirical Formula                         | $\text{C}_{37}\text{H}_{24}\text{N}_4\text{O}_2\text{Pd}$ |
| Formula weight                            | 663.00                                                    |
| T (K)                                     | 293(2)                                                    |
| System                                    | Monoclinic                                                |
| Space group                               | $P2_1/c$                                                  |
| $a$ (Å)                                   | 9.875(5)                                                  |
| $b$ (Å)                                   | 30.125(5)                                                 |
| $c$ (Å)                                   | 20.458(5)                                                 |
| $\alpha$ (°)                              | 90                                                        |
| $\beta$ (°)                               | 91.168(5)                                                 |
| $\gamma$ (°)                              | 90                                                        |
| $V$ (Å <sup>3</sup> )                     | 6085(4)                                                   |
| $Z$                                       | 8                                                         |
| $\rho_{\text{calc}}$ (mg/m <sup>3</sup> ) | 1.447                                                     |
| $F(000)$                                  | 2688.0                                                    |
| Goodness-of-fit (GOF) on $F^2$            | 1.024                                                     |
| Final $R$ indices [ $I > 2\sigma(I)$ ]    | $R_1 = 0.1018$ , $wR_2 = 0.1768$                          |
| $R$ indices (all data)                    | $R_1 = 0.2203$ , $wR_2 = 0.2234$                          |
| CCDC No.                                  | 1522061                                                   |
